## Control and function of arm swing in human walking and running

H. Pontzer, J. H. Holloway, 4th, D. A. Raichlen and D. E. Lieberman

10.1242/jeb.030478

There was an error published in *J. Exp. Biol.* **212**, 523-534.

The second author was incorrectly listed as John H. Holloway, 3rd.

His name should have read: John H. Holloway, 4th
